# Supplementary material
Source: PubMed Central journal article supplement (PMC6570818)
Supplement: NIHMS1031158-supplement-Supplementary_Data.pdf [file NIHMS1031158-supplement-Supplementary_Data.pdf]

## SUPPLEMENTARY DATA

### **Appendix 1.** Search method

(((((("vitamin d"[MeSH Terms] OR "vitamin d"[All Fields] OR "ergocalciferols"[MeSH Terms] OR "ergocalciferols"[All Fields]) AND incident[All Fields]) AND ("breast neoplasms"[MeSH Terms] OR ("breast"[All Fields] AND "neoplasms"[All Fields]) OR "breast neoplasms"[All Fields] OR ("breast"[All Fields] AND "cancer"[All Fields]) OR "BC"[All Fields])) AND ("25-hydroxyvitamin D"[Supplementary Concept] OR "25-hydroxyvitamin D"[All Fields] OR "25 hydroxyvitamin d"[All Fields] OR "calcifediol"[MeSH Terms] OR "calcifediol"[All Fields])) OR 25[All Fields] AND ("hydroxide ion"[Supplementary Concept] OR "hydroxide ion"[All Fields] OR "oh"[All Fields]) AND D[All Fields]) AND ("epidemiology"[Subheading] OR "epidemiology"[All Fields] OR "incidence"[All Fields] OR "incidence"[MeSH Terms]) AND ("free full text"[sb] AND ("2007/01/01"[PDAT] : "2017/01/01"[PDAT]) AND "humans"[MeSH Terms] AND English[lang] AND "female"[MeSH Terms] AND "adult"[MeSH Terms])).

**Appendix 2. Quality score**

The quality score is composed of 5 items, and each item was allocated 0, 1 or 2 points. This allowed a total score between 0 and 8 points, 8 representing the highest quality. The following items are included in the score:

**1. Study design**

**0** for case-control studies

**1** for cross-sectional studies

**2** for longitudinal studies (retrospective or prospective) or non-randomized intervention studies

**2. Population**

*Observational studies*

**0** if n <500

**1** if n 500 to 2000

**2** if n >2000

**3. Outcome (see table below)**

|           | <b>0</b>                                                                                                                                  | <b>1</b>                                                                                                                                                                                                   | <b>2</b>                                                                                                   |
|-----------|-------------------------------------------------------------------------------------------------------------------------------------------|------------------------------------------------------------------------------------------------------------------------------------------------------------------------------------------------------------|------------------------------------------------------------------------------------------------------------|
| <b>BC</b> | If not reported or if diagnosis was based on a proxy for disease (i.e. use of medication that is not specific to the disease or symptoms) | If diagnosis was self-reported or retrieved from reports (e.g. medical records) not collected specifically for study or was based on the use of disease-specific medication (e.g. antidiabetic medication) | If diagnosis was made during study using adequate test or official registries were checked by a researcher |

## SUPPLEMENTARY DATA

### 4. Adjustments

**0** if findings are not controlled\*\* for at least age and gender

**1** if findings are controlled for age and gender

**2** if an intervention study is adequately randomized or if findings are additionally controlled for other key covariates (e.g. age at menarche, parity, family history of BC etc.)

\*\* *'Controlled for' here refers to: adjusted for in the statistical analyses (e.g. with multiple regression); stratified for in the analyses (e.g. pre- and post-menopausal separately); or narrow selection criteria of study participants on this covariate (e.g. Pre-menopausal women only).*

SUPPLEMENTARY DATA

Begg's Test

adj. Kendall's Score (P-Q) = 68

Std. Dev. of Score = 50.62

Number of Studies = 28

z = 1.34

Pr > |z| = 0.179

z = 1.32 (continuity corrected)

Pr > |z| = 0.186 (continuity corrected)

Egger's test

---

| Std_Eff | Coef.     | Std. Err. | t     | P> t  | [95% Conf. Interval] |          |
|---------|-----------|-----------|-------|-------|----------------------|----------|
| slope   | -.0235691 | .0135     | -1.75 | 0.093 | -.0513188            | .0041805 |
| bias    | .7586765  | .6614072  | 1.15  | 0.262 | -.6008655            | 2.118218 |

---

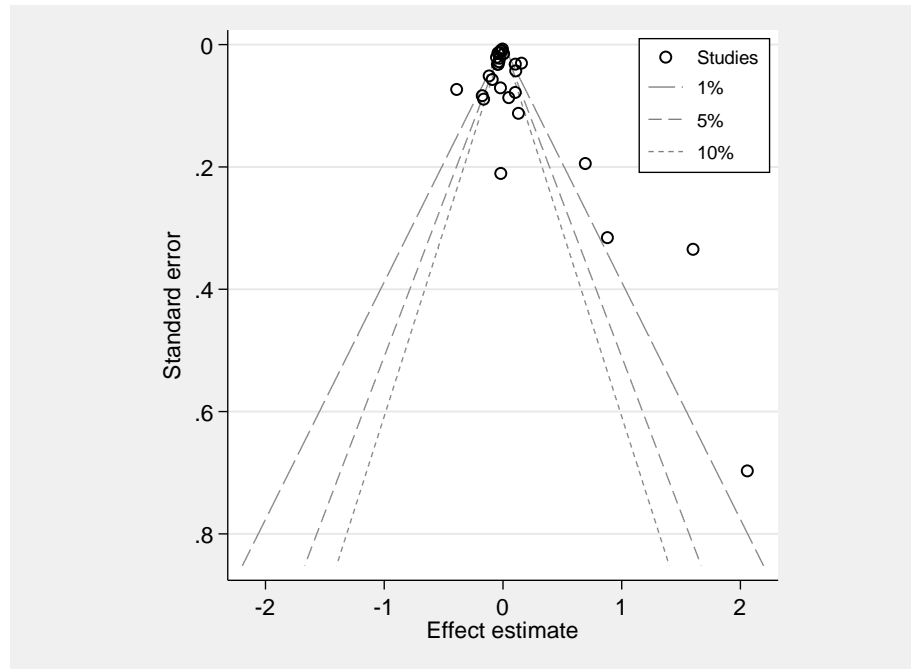

**Supplemental Figure 1.** Begg's funnel plot of all data-points included in the meta-analysis (n=28 data-points), 2000-2018

SUPPLEMENTARY DATA

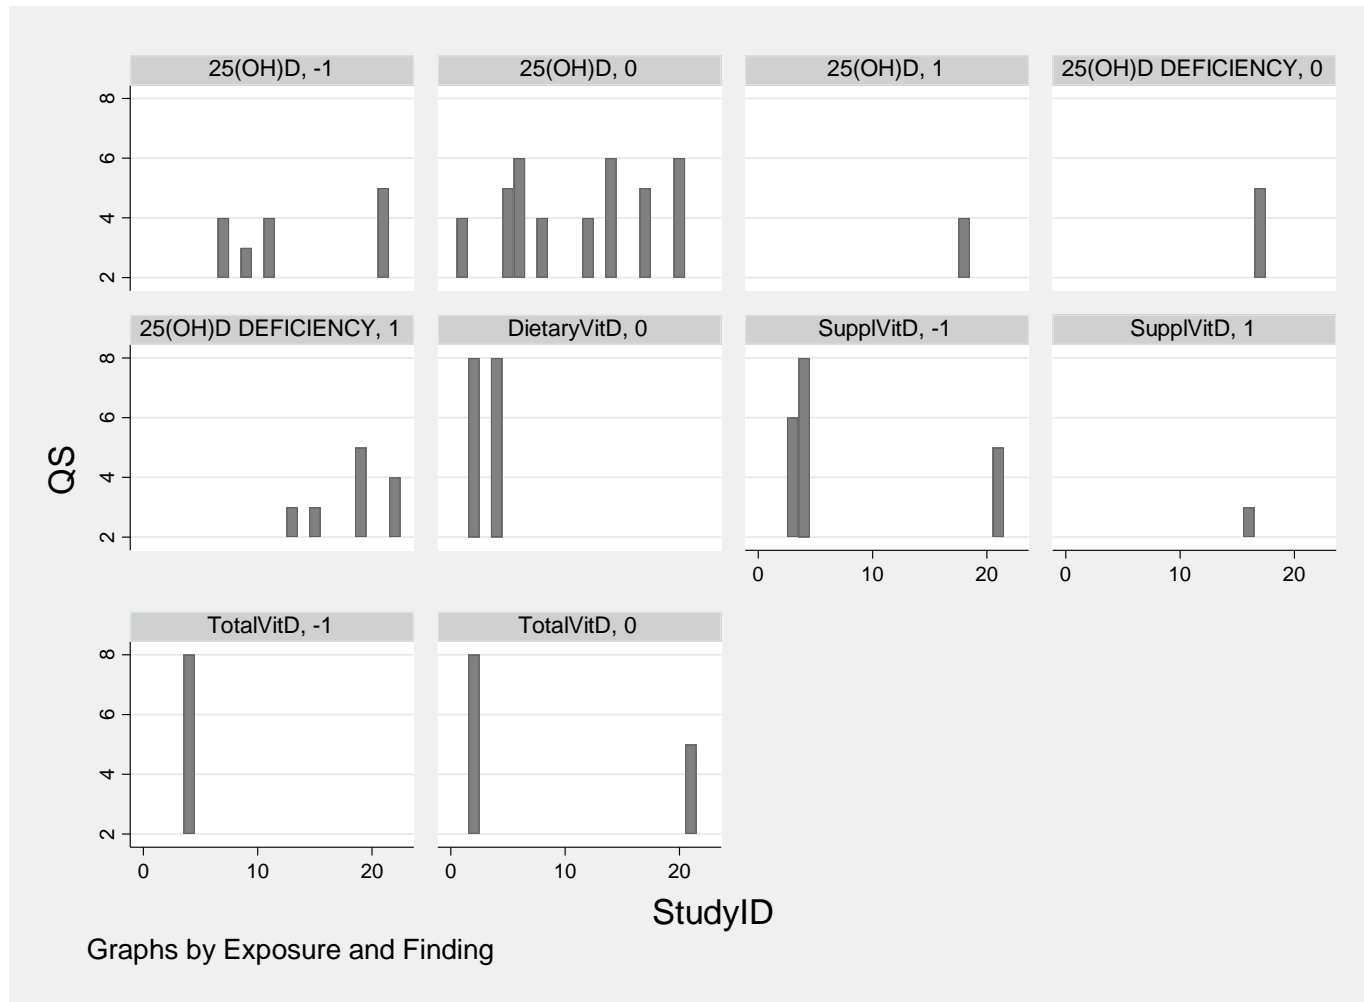

**Supplemental Figure 2** Harvest plot of quality scores (QS) by type of exposures and qualitative finding

*Note:* QS are presented by exposure/qualitative finding pair and annotated by Study ID. Qualitative finding can be -1="Inverse association", 0="null finding" or 1="Positive association".
